# Supplementary material for: DDC-Promoter-Driven Chemogenetic Activation of SNpc Dopaminergic Neurons Alleviates Parkinsonian Motor Symptoms
Source: MDPI journal article supplement (doi:10.3390/ijms24032491), 2023-01-27
Supplement: s1 [file s1]

## Supplementary Materials

# DDC-Promoter-Driven Chemogenetic Activation of SNpc Dopaminergic Neurons Alleviates Parkinsonian Motor Symptoms

Dong-Chan Seo <sup>1,2,3</sup>, Yeon Ha Ju <sup>2</sup>, Jin-Ju Seo <sup>1,4</sup>, Soo-Jin Oh <sup>2</sup>, C. Justin Lee <sup>5</sup>, Seung Eun Lee <sup>1,\*</sup> and Min-Ho Nam <sup>2,6,\*</sup>

<sup>1</sup> Research Animal Resource Center, Korea Institute of Science and Technology (KIST), Seoul 02456, Republic of Korea

<sup>2</sup> Brain Science Institute, Korea Institute of Science and Technology (KIST), Seoul 02456, Republic of Korea

<sup>3</sup> Department of Integrated Biomedical and Life Sciences, College of Health Science, Korea University, Seoul 02841, Republic of Korea

<sup>4</sup> Technological Convergence Center, Korea Institute of Science and Technology (KIST), Seoul 02456, Republic of Korea

<sup>5</sup> Center for Cognition and Sociality, Institute for Basic Science, Daejeon 34126, Republic of Korea

<sup>6</sup> Department of KHU-KIST Convergence Science & Technology, Kyung Hee University, Seoul 02447, Republic of Korea

\* Correspondence: selee@kist.re.kr (S.E.L.); dr.namminho@kist.re.kr (M.-H.N.)

| Sample no.                                                        | #1     | #2     | #3     | #4     | avg.   |
|-------------------------------------------------------------------|--------|--------|--------|--------|--------|
| Number of rDDC-mCh <sup>+</sup> neurons                           | 171    | 189    | 178    | 101    | 160    |
| Number of rDDC-mCh <sup>+</sup> DDC <sup>+</sup> neurons          | 133    | 141    | 123    | 75     | 118    |
| rDDC-mCh <sup>+</sup> DDC <sup>+</sup> /rDDC-mCh <sup>+</sup> (%) | 77.78% | 74.60% | 69.10% | 74.26% | 73.93% |

**Table S1.** Raw data table for Figure 1e.

| sAP frequency (Hz) |         |         |
|--------------------|---------|---------|
| Rat no.            | Before  | + CNO   |
| #1                 | 1.2666  | 2.0666  |
| #2                 | 11.1333 | 20.6667 |
| #3                 | 7.5333  | 9.1333  |

|    |         |      |
|----|---------|------|
| #4 | 12.4333 | 17.1 |
| #5 | 6.36    | 15.1 |

**Table S2.** Raw data table for Figure 2f.

| Stepping test |         | Stepping ratio (contralateral step number / total step number) |       |       |
|---------------|---------|----------------------------------------------------------------|-------|-------|
| Group         | Rat no. | Before                                                         | PD    | + CNO |
| Control       | #1      | 0.500                                                          | 0.449 | 0.443 |
|               | #2      | 0.482                                                          | 0.429 | 0.417 |
|               | #3      | 0.500                                                          | 0.438 | 0.400 |
|               | #4      | 0.510                                                          | 0.460 | 0.440 |
|               | #5      | 0.480                                                          | 0.430 | 0.460 |
|               | #6      | 0.500                                                          | 0.440 | 0.390 |
| hM3Dq         | #1      | 0.500                                                          | 0.418 | 0.464 |
|               | #2      | 0.506                                                          | 0.424 | 0.508 |
|               | #3      | 0.490                                                          | 0.450 | 0.500 |
|               | #4      | 0.500                                                          | 0.510 | 0.490 |
|               | #5      | 0.490                                                          | 0.450 | 0.480 |
|               | #6      | 0.490                                                          | 0.450 | 0.490 |

**Table S3.** Raw data table for Figure 3c.

| Balance beam test |         | Foot slip (#) |     |       |
|-------------------|---------|---------------|-----|-------|
| Group             | Rat no. | Before        | PD  | + CNO |
| Control           | #1      | 2.5           | 3   | 5.5   |
|                   | #2      | 1             | 2   | 2.5   |
|                   | #3      | 2             | 5.5 | 6     |
|                   | #4      | 0.5           | 2.5 | 8     |
|                   | #5      | 2.5           | 1.5 | 8.5   |
|                   | #6      | 1             | 3.5 | 6     |
| hM3Dq             | #1      | 5.5           | 4.5 | #1    |
|                   | #2      | 0.5           | 2.5 | 2     |
|                   | #3      | 2.5           | 6.5 | 1     |
|                   | #4      | 2             | 4.5 | 4.5   |
|                   | #5      | 1.5           | 5   | 0.5   |

|  |    |   |     |     |
|--|----|---|-----|-----|
|  | #6 | 1 | 7.5 | 2.5 |
|--|----|---|-----|-----|

**Table S4.** Raw data table for [Figure 4b](#).

| Balance beam test |         | Balance beam score |     |       |
|-------------------|---------|--------------------|-----|-------|
| Group             | Rat no. | Before             | PD  | + CNO |
| Control           | #1      | 3.5                | 3.5 | 2.5   |
|                   | #2      | 4.5                | 4   | 3.5   |
|                   | #3      | 3.5                | 2.5 | 2.5   |
|                   | #4      | 4.5                | 3.5 | 1.5   |
|                   | #5      | 4.5                | 3.5 | 2.5   |
|                   | #6      | 4.5                | 2   | 3     |
| hM3Dq             | #1      | 4.5                | 2.5 | 3     |
|                   | #2      | 4.5                | 3.5 | 4     |
|                   | #3      | 3.5                | 2.5 | 4     |
|                   | #4      | 4                  | 2   | 2.5   |
|                   | #5      | 4                  | 2.5 | 4.5   |
|                   | #6      | 4.5                | 2   | 4     |

**Table S5.** Raw data table for [Figure 4c](#).

| Group         | Rat no. | Portion of c-fos <sup>+</sup> out of mCh <sup>+</sup> neurons (%) |
|---------------|---------|-------------------------------------------------------------------|
| Control + CNO | #1      | 0%                                                                |
|               | #2      | 6%                                                                |
|               | #3      | 14%                                                               |
|               | #4      | 5%                                                                |
|               | #5      | 13%                                                               |
|               | #6      | 17%                                                               |
|               | #7      | 35%                                                               |
|               | #8      | 44%                                                               |
| hM3Dq + CNO   | #1      | 80%                                                               |
|               | #2      | 70%                                                               |
|               | #3      | 75%                                                               |

|  |    |     |
|--|----|-----|
|  | #4 | 77% |
|  | #5 | 61% |
|  | #6 | 46% |
|  | #7 | 68% |
|  | #8 | 70% |

**Table S6.** Raw data table for [Figure 5b](#).

| TH <sup>+</sup> neuron ratio (ipsi/contra) (%) |         |                       |                       |                       |                       |
|------------------------------------------------|---------|-----------------------|-----------------------|-----------------------|-----------------------|
| Group                                          | Rat no. | AP -5.30 ~ 5.59<br>mm | AP -5.30 ~ 5.79<br>mm | AP -5.80 ~ 6.03<br>mm | AP -6.04 ~ 6.30<br>mm |
| Control +<br>CNO                               | #1      | 37.85%                | 31.35%                | 2.3%                  | 62.09%                |
|                                                | #2      | 50.76%                | 30.96%                | 9.5%                  | 48.59%                |
|                                                | #3      | 47.16%                | 32.21%                | 53.44%                | 13.08%                |
|                                                | #4      | 41.7%                 | 27.27%                | 81.56%                | 70%                   |
|                                                | #5      | 40.55%                | 17.62%                | 16.08%                | 54.76%                |
|                                                | #6      | 64.68%                | 8%                    | 41.33%                | 73.61%                |
|                                                | #7      | 33.86%                | 23.75%                | 74.23%                | 73.79%                |
|                                                | #8      | 54.31%                | 35.88%                | 50.56%                | 77.61%                |
| hM3Dq +<br>CNO                                 | #1      | 60.54%                | 95.77%                | 98%                   | 61.33%                |
|                                                | #2      | 88.67%                | 44%                   | 90%                   | 63.72%                |
|                                                | #3      | 76.43%                | 41.18%                | 90.28%                | 89.62%                |
|                                                | #4      | 82.28%                | 68.29%                | 96.4%                 | 88.09%                |
|                                                | #5      | 80.47%                | 72.31%                | 45.93%                | 87.3%                 |
|                                                | #6      | 84.73%                | 75.92%                | 65.42%                | 26.24%                |
|                                                | #7      | 53.55%                | 65.42%                | 97.99%                | 76.5%                 |
|                                                | #8      | 61.94%                | 80.53%                | 91.67%                | 71.63%                |

**Table S7.** Raw data table for [Figure 6b,c](#).

| Group         | slice | % of striatal TH staining density<br>(ipsi/contra) |
|---------------|-------|----------------------------------------------------|
| Control + CNO | #1    | 30%                                                |
|               | #2    | 48%                                                |
|               | #3    | 46%                                                |
|               | #4    | 49%                                                |
|               | #5    | 58%                                                |
|               | #6    | 57%                                                |
|               | #7    | 68%                                                |
|               | #8    | 54%                                                |
| hM3Dq + CNO   | #1    | 74%                                                |
|               | #2    | 72%                                                |
|               | #3    | 90%                                                |
|               | #4    | 72%                                                |
|               | #5    | 90%                                                |
|               | #6    | 81%                                                |
|               | #7    | 72%                                                |
|               | #8    | 86%                                                |

**Table S8.** Raw data table for [Figure 7b](#).
